# Supplementary material
Source: Springer Nature journal article supplement (https://www.springermedizin.de/resource/supplementary/12884_2014_1067_MOESM1_ESM.pdf/9458832)

**Cytokeratin 7****4F2hc****Full-term CTRL**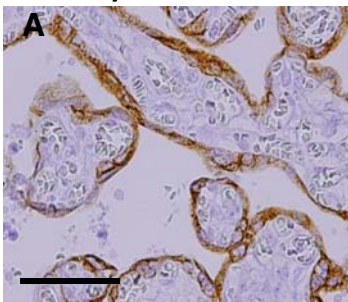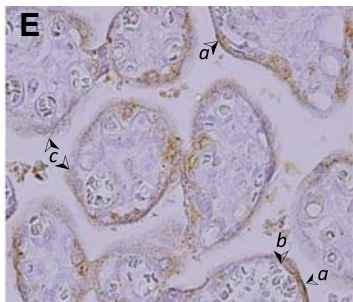**Pre-term CTRL**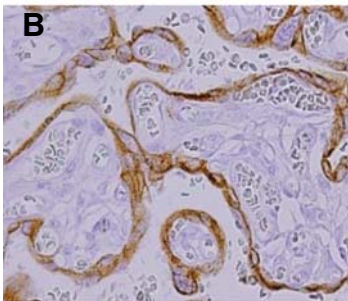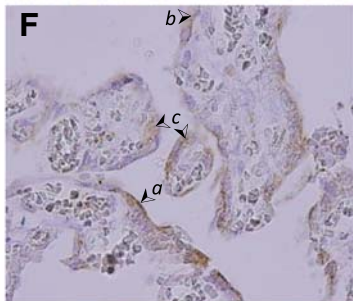**PE**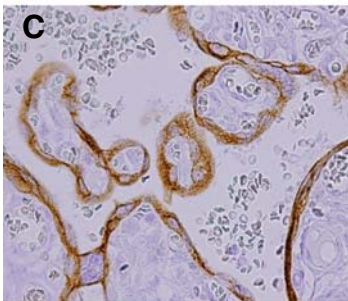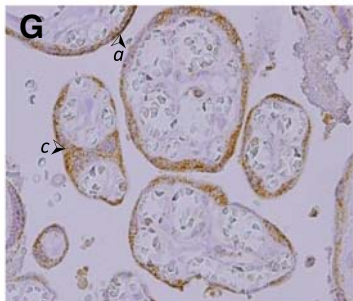**IUGR**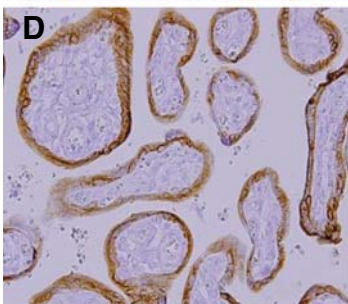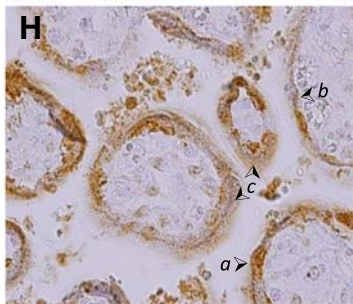

Supplement: MOESM1 [file 9458832]
